# Supplementary material for: Multi-omics monitoring of drug response in rheumatoid arthritis in pursuit of molecular remission
Source: PubMed Central journal article supplement (PMC6048065; doi:10.1038/s41467-018-05044-4), 2018-07-16
Supplement: 41467_2018_5044_MOESM3_ESM.pdf [file 41467_2018_5044_MOESM3_ESM.pdf]

## **Description of Additional Supplementary Files**

File Name: Supplementary Data 1

Description: Variable importance statistics from PLSR models of the mRNA microarray, protein array and cell abundance.

File Name: Supplementary Data 2

Description: Variables affected by MTX, IFX and TCZ.

File Name: Supplementary Data 3

Description: Untreatable variables for MTX, IFX and TCZ of the mRNA microarray, and protein array.

File Name: Supplementary Data 4

Description: Disease-wide profile of transcriptional RMSs.

File Name: Supplementary Data 5

Description: Samples used in omics profiling.
